# Supplementary material for: Structural basis for the inhibition of RecBCD by Gam and its synergistic antibacterial effect with quinolones
Source: eLife journal article supplement (doi:10.7554/elife.22963), 2016-12-23
Supplement: supp [file elife-22963-supp-v1.zip]

Archive with 9 entries (9 files):
- elife_poa_e22963_Figure_2_figure_supplement_2.pdf
- elife_poa_e22963_Video_1.mov
- elife_poa_e22963_Video_3.mov
- elife_poa_e22963_Figure_1_figure_supplement_1.pdf
- elife_poa_e22963_Figure_1_source_data_1.docx
- elife_poa_e22963_Figure_2_figure_supplement_1.pdf
- elife_poa_e22963_Figure_1_figure_supplement_2.pdf
- elife_poa_e22963_Figure_3_figure_supplement_1.pdf
- elife_poa_e22963_Video_2.mov
