# Supplementary figures and images for: Structural basis for the inhibition of RecBCD by Gam and its synergistic antibacterial effect with quinolones
Source: eLife journal article supplement (doi:10.7554/elife.22963), 2016-12-23

Figure 1 – Figure Supplement 2

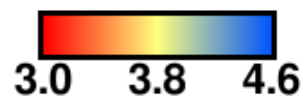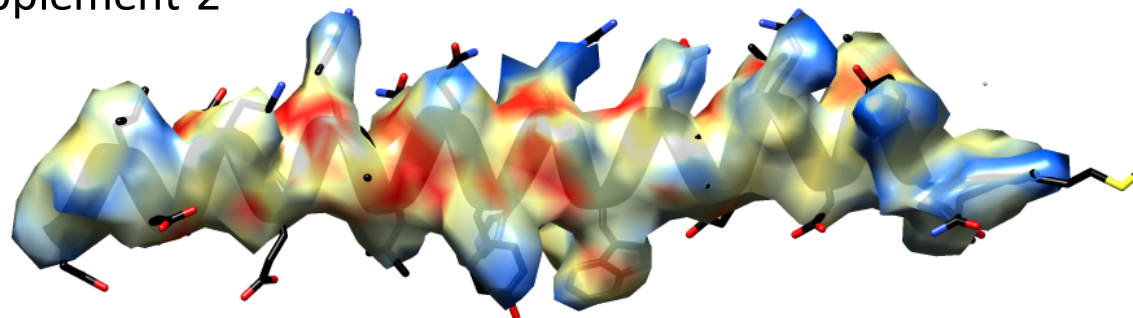

**All**  
100 %  
3.8 Å

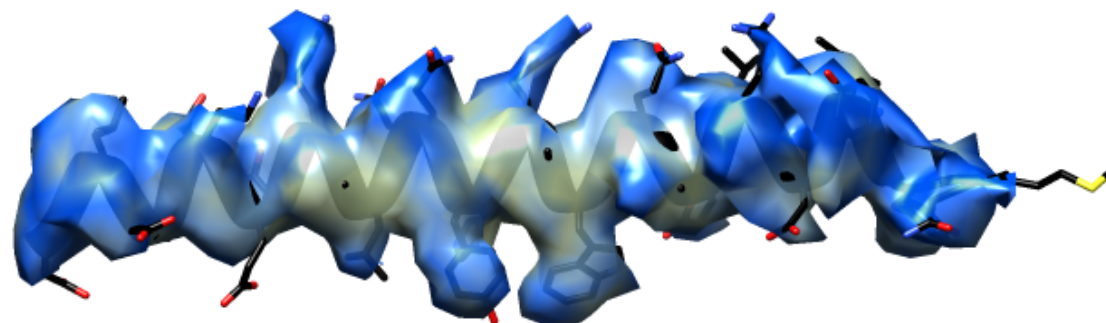

**Class1**  
30 %  
4.0 Å

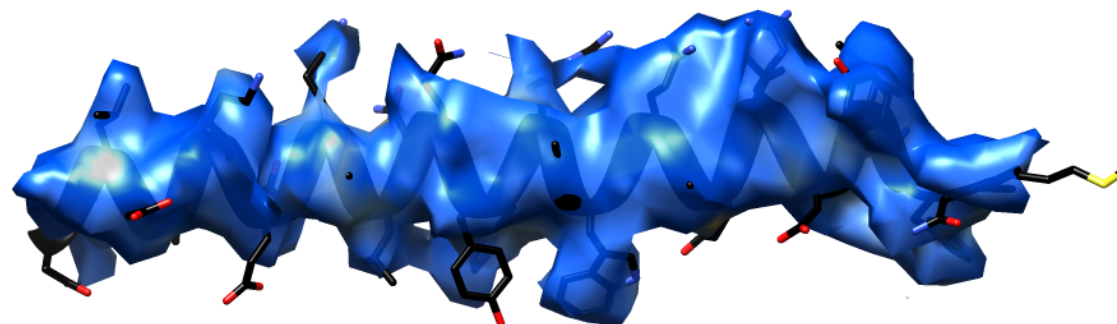

**Class2**  
22 %  
4.2 Å

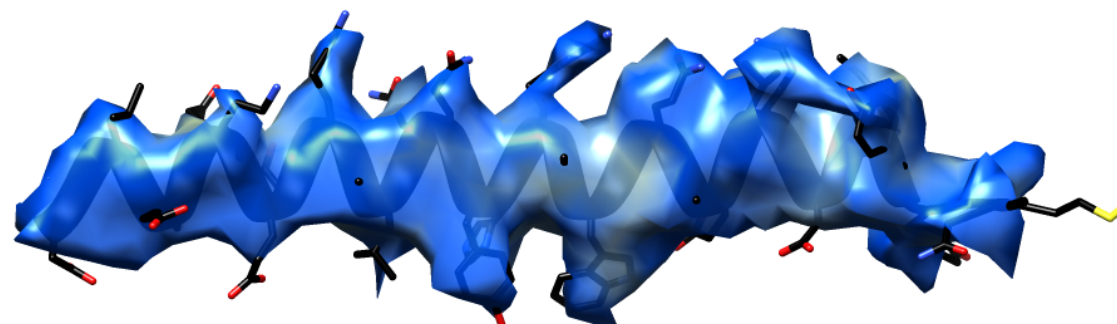

**Class3**  
30 %  
4.2 Å

Supplement: supp [file elife-22963-supp-v1.zip]

Figure 2 – Figure Supplement 2

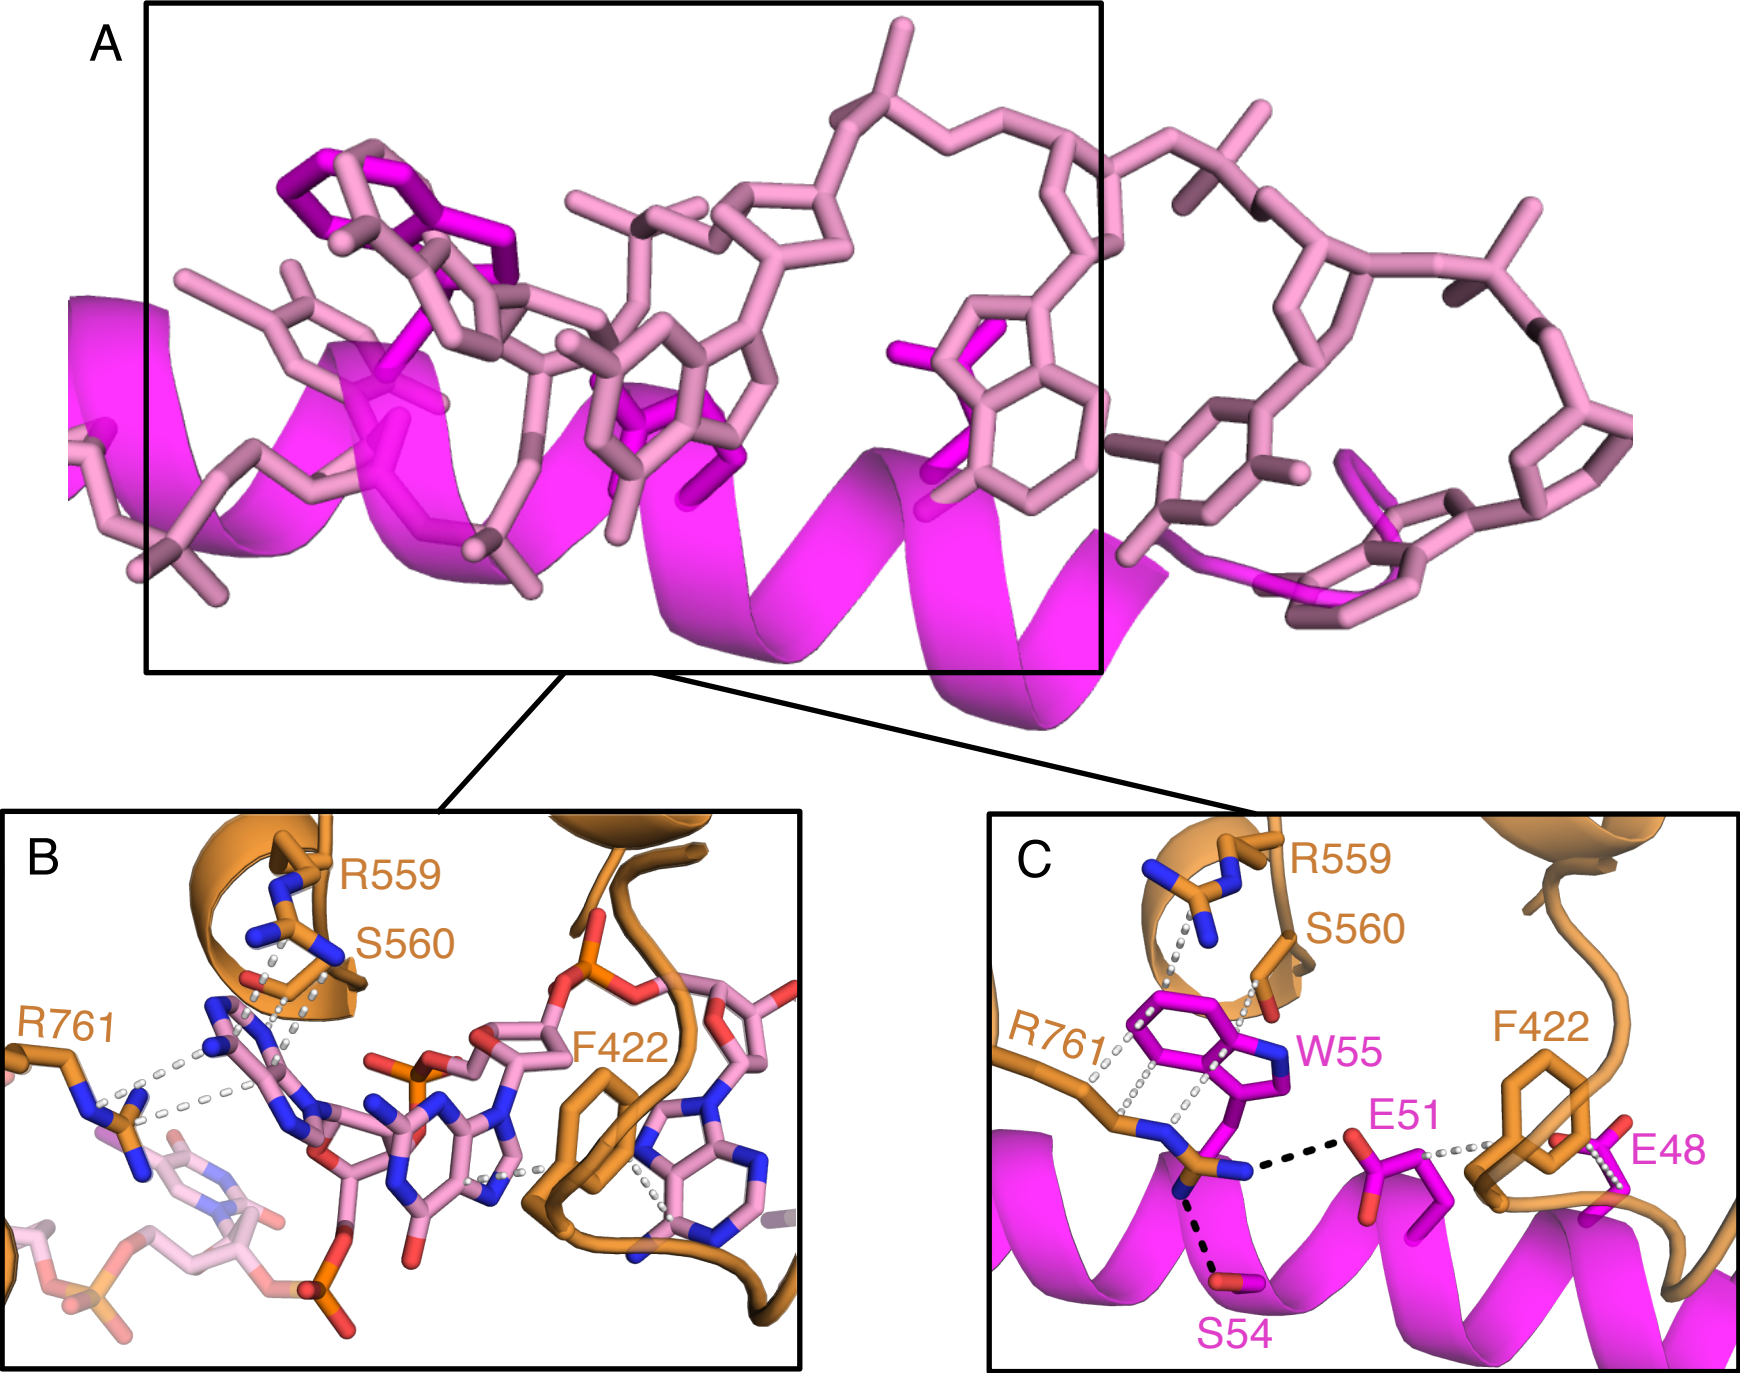

Supplement: supp [file elife-22963-supp-v1.zip]

Figure 2 – Figure Supplement 1

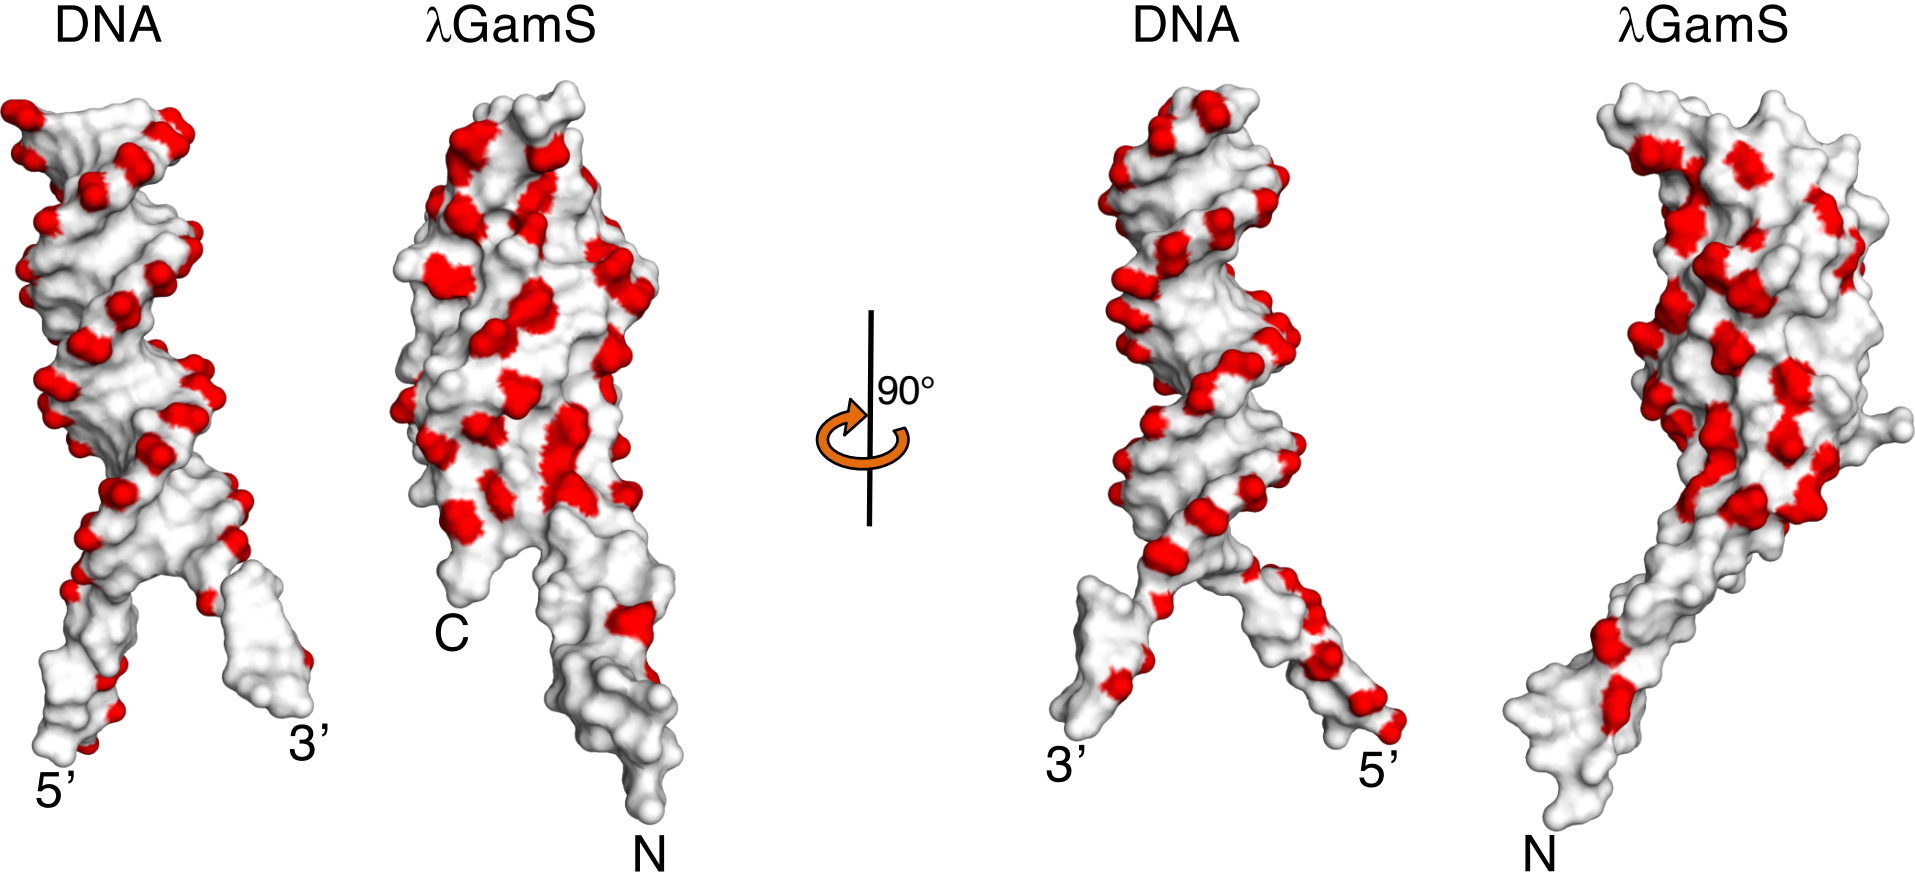

Supplement: supp [file elife-22963-supp-v1.zip]

Figure 3 - Supplementary Figure 1

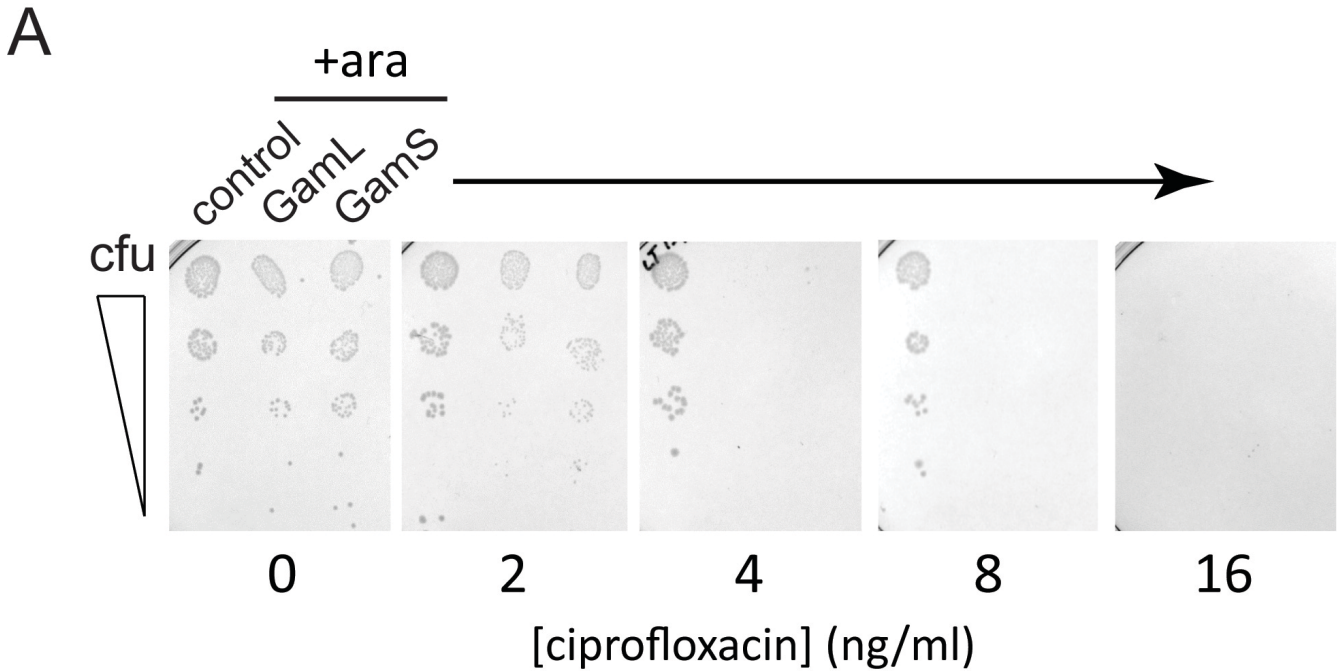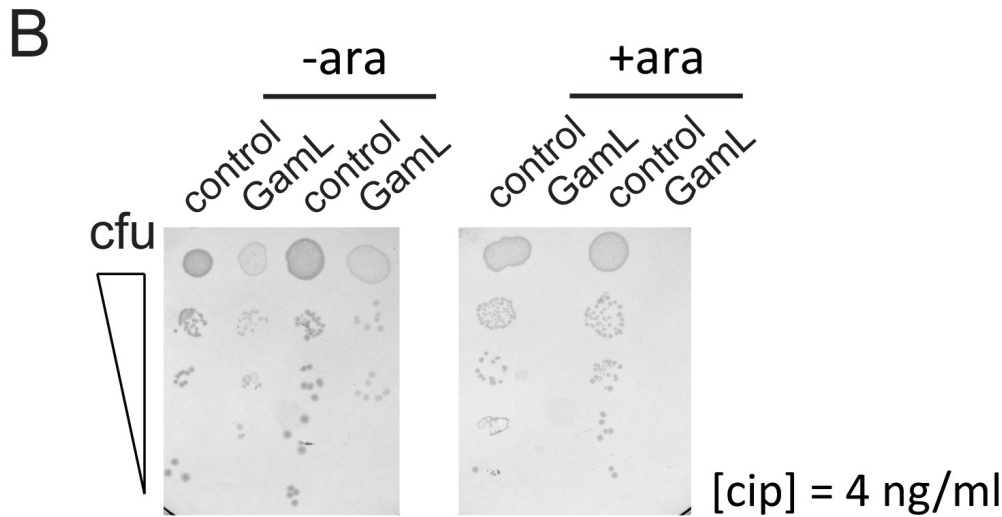

Supplement: supp [file elife-22963-supp-v1.zip]

Figure 1 – Figure Supplement 1

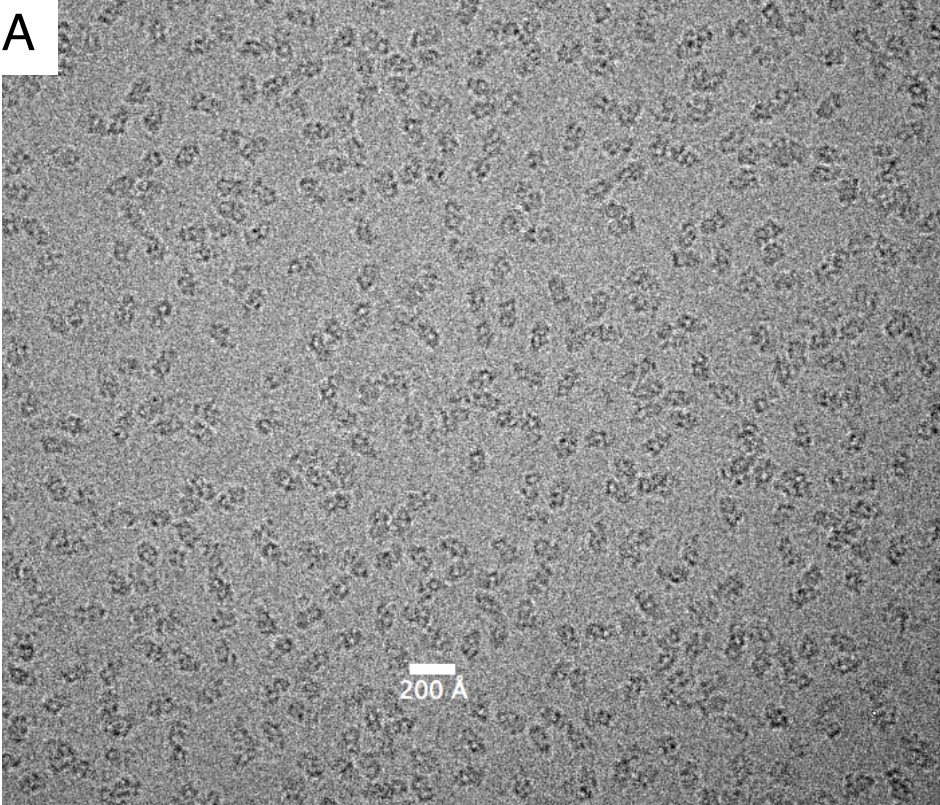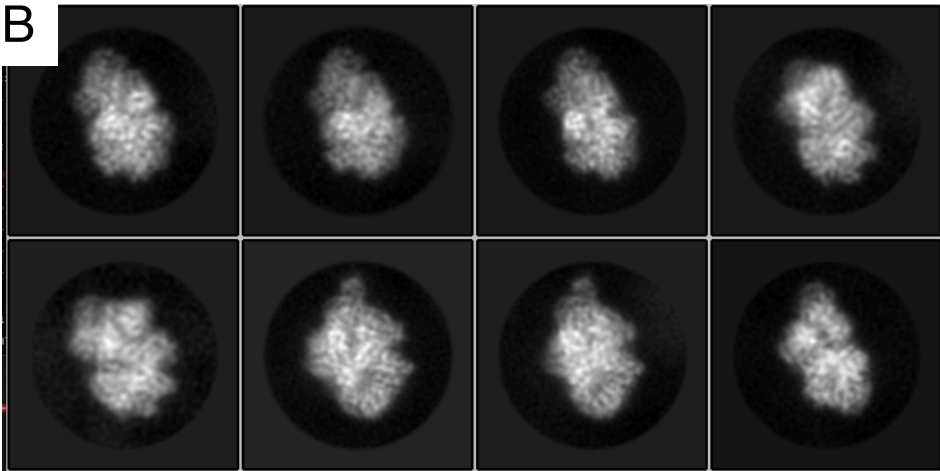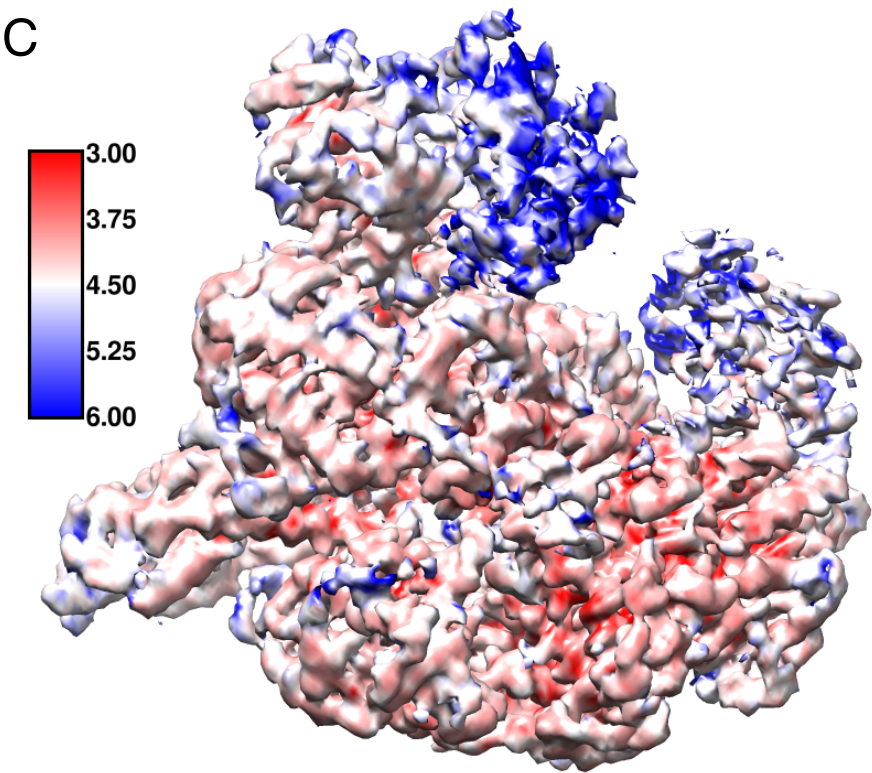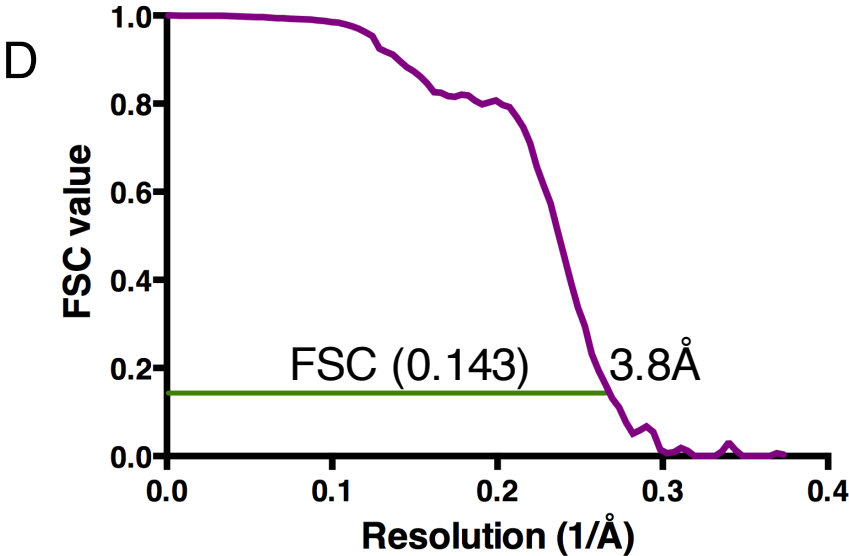

Supplement: supp [file elife-22963-supp-v1.zip]
